# Supplementary material
Source: Springer Nature journal article supplement (https://www.springermedizin.de/resource/supplementary/12889_2007_990_MOESM1_ESM.pdf/9502606)

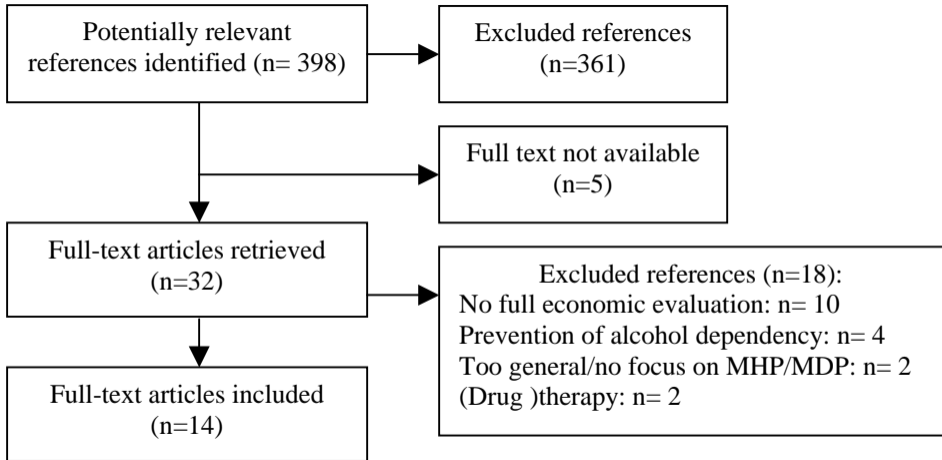

Supplement: MOESM1 [file 9502606]
